# Supplementary material
Source: ML conference proceedings conference paper supplement (https://openaccess.thecvf.com/content/CVPR2023/html/Du_Efficient_Mask_Correction_CVPR_2023_paper.html)
Supplement: Supplementary file 1 [file Du_Efficient_Mask_Correction_CVPR_2023_supplemental.pdf]

# Supplementary File for Efficient Mask Correction for Click-Based Interactive Image Segmentation

Fei Du, Jianlong Yuan, Zhibin Wang, Fan Wang  
Alibaba Group

{dufei.df, gongyuan.yjl, zhibin.waz, fan.w}@alibaba-inc.com

## 1. Speed on GPUs

Table 1 shows the average inference time per click of different methods on GPUs. Our mask correction network is more efficient compared to RITM [3] and FocalClick [1]

|                     | HRNet18s | HRNet32 | SegB0   | SegB3   |
|---------------------|----------|---------|---------|---------|
| RITM                | 30 / 22  | 59 / 40 | -       | -       |
| FocalClick          | 35 / 26  | 61 / 45 | 21 / 16 | 44 / 34 |
| Ours-FirstClick     | 38 / 30  | 70 / 47 | 23 / 17 | 54 / 36 |
| Ours-MaskCorrection | 9 / 7    | 10 / 7  | 9 / 7   | 10 / 7  |

Table 1. The average inference time (ms) per click of comparison methods with different backbones on NVIDIA P100/V100 GPUs.

## 2. Results on COCO

We further test our method on the COCO validation set [2]. As shown in Table 2, our method shows better or comparable performance to the FocalClick [1]. However, on this challenging dataset where more clicks are required to achieve a high IoU, the overall inference time of our method is significantly lower than FocalClick [1].

| Backbone | Ours        |            | FocalClick  |            |
|----------|-------------|------------|-------------|------------|
|          | NoC@85/90   | Time@85/90 | NoC@85/90   | Time@85/90 |
| hrnet18s | 5.44 / 9.00 | 18 / 26min | 5.96 / 9.43 | 31 / 46min |
| hrnet32  | 5.06 / 8.47 | 20 / 30min | 5.47 / 8.92 | 41 / 63min |
| SegB0    | 5.62 / 9.05 | 17 / 24min | 5.75 / 9.17 | 22 / 33min |
| SegB3    | 4.79 / 8.22 | 18 / 28min | 4.85 / 8.11 | 30 / 45min |

Table 2. Comparison with FocalClick on the COCO validation set. The total inference time is measured on 4 NVIDIA V100 GPU.

## 3. Work with preexisting masks

Our mask correction network can also take as input a pre-existing mask generated by other tools. Table 3 shows the results with and without the preexisting mask on DAVIS-585 dataset provided by FocalClick [1]. Our method can

work with preexisting masks to reduce the number of clicks even if our method is not optimized for this purpose.

| Methods       | w/ preexisting mask |        | w/o preexisting mask |        |
|---------------|---------------------|--------|----------------------|--------|
|               | NoC@85              | NoC@90 | NoC@85               | NoC@90 |
| Ours-hrnet18s | 2.94                | 4.32   | 5.01                 | 7.40   |
| Ours-hrnet32  | 2.97                | 4.47   | 4.32                 | 6.63   |
| Ours-SegB0    | 3.43                | 5.05   | 5.03                 | 7.56   |
| Ours-SegB3    | 3.14                | 4.62   | 4.27                 | 6.55   |

Table 3. The performance of our methods with and without the preexisting mask on DAVIS-585 dataset.

## References

- [1] Xi Chen, Zhiyan Zhao, Yilei Zhang, Manni Duan, Donglian Qi, and Hengshuang Zhao. Focalclick: Towards practical interactive image segmentation. In *CVPR*, pages 1300–1309, 2022. 1
- [2] Tsung-Yi Lin, Michael Maire, Serge J. Belongie, James Hays, Pietro Perona, Deva Ramanan, Piotr Dollár, and C. Lawrence Zitnick. Microsoft COCO: Common objects in context. In *ECCV*, volume 8693, pages 740–755, 2014. 1
- [3] Konstantin Sofiiuk, Ilya A Petrov, and Anton Konushin. Reviving iterative training with mask guidance for interactive segmentation. In *ICIP*, pages 3141–3145, 2022. 1
